# Supplementary material for: Chitosan nanoparticles as a green and renewable catalyst in the synthesis of 1,4-dihydropyridine under solvent-free conditions
Source: Royal Society of Chemistry journal article supplement (doi:10.1039/c4nj01730g), 2014-12-10
Supplement: c4nj01730g1.pdf [file c4nj01730g1.pdf]

Supporting Information  
New Journal of Chemistry

Chitosan nanoparticles as a green and renewable catalyst in synthesis of  
1,4-dihydropyridine under solvent-free conditions

Javad Safari \*, Fatemeh Azizi and Masoud Sadeghi

\* Laboratory of Organic Compound Research, Department of Organic Chemistry, College of Chemistry, University of Kashan, P. O. Box: 87317-51167, Kashan, Islamic Republic of Iran

Figure 1. SEM micrograph of synthesized chitosan NPs

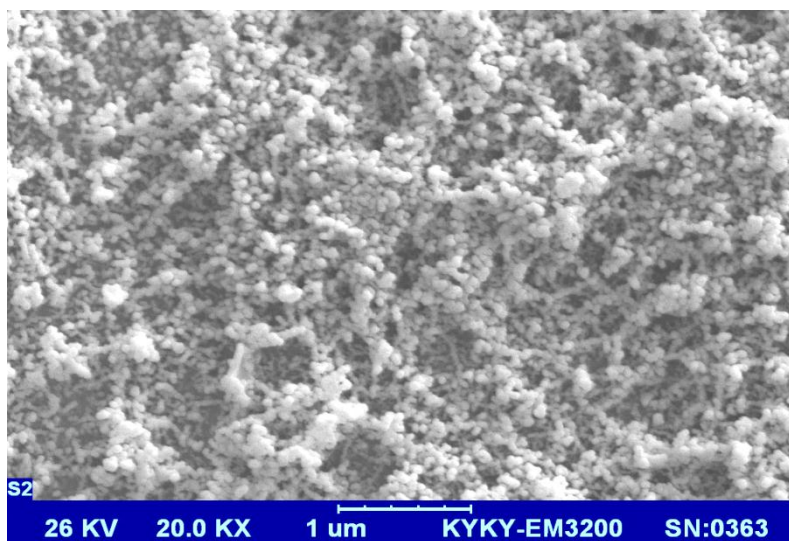

Figure 2. XRD of Chitosan

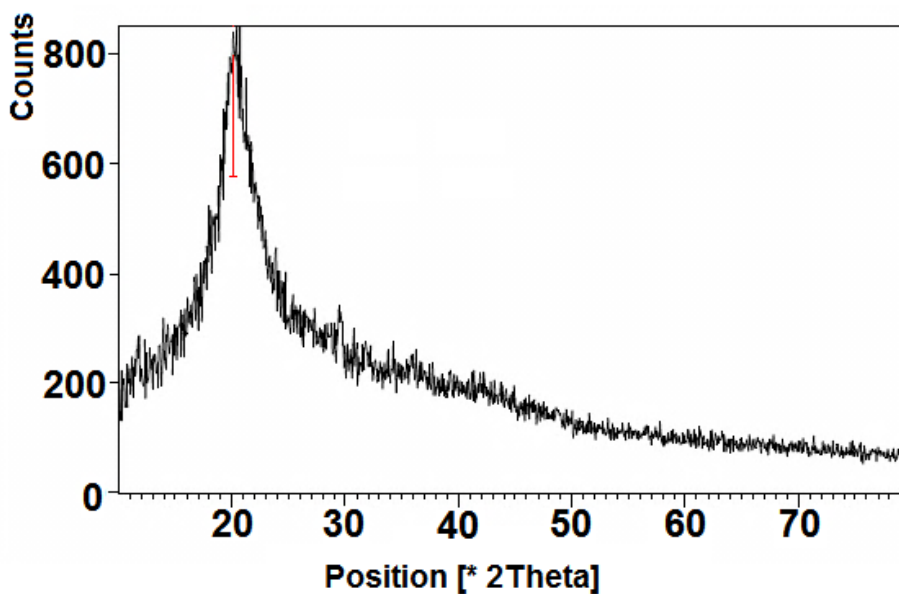

Figure 4. FT-IR spectra of sulfonated Chitosan

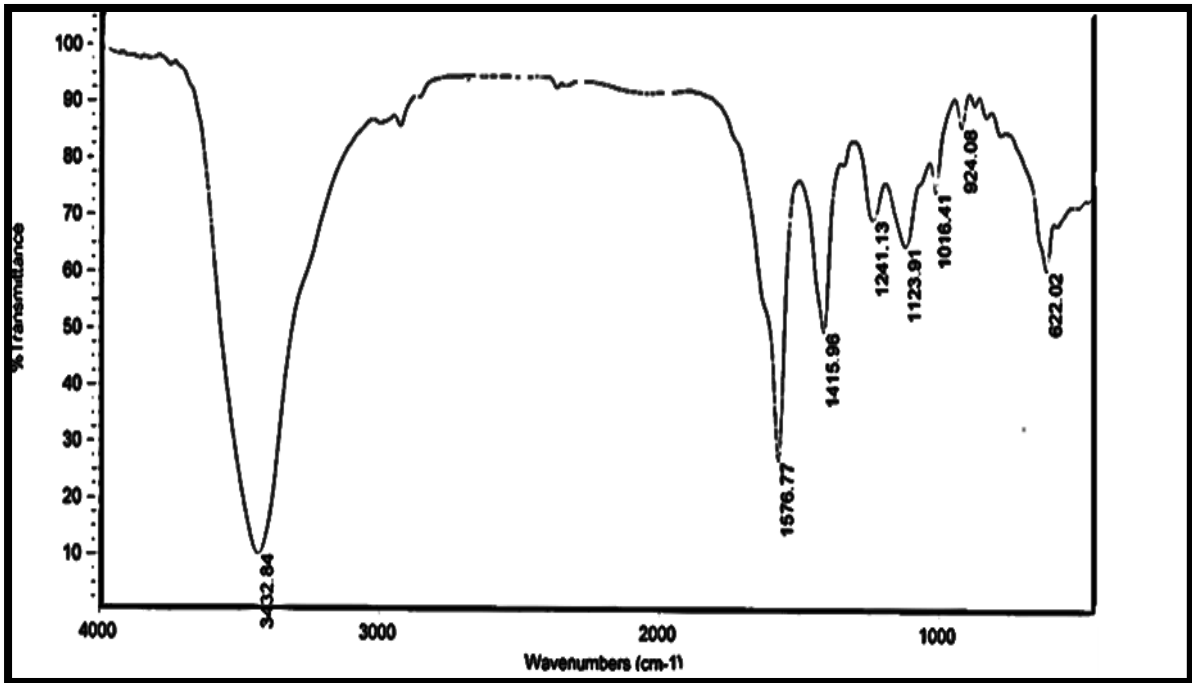

Figure 5. Raman spectra of Chitosan

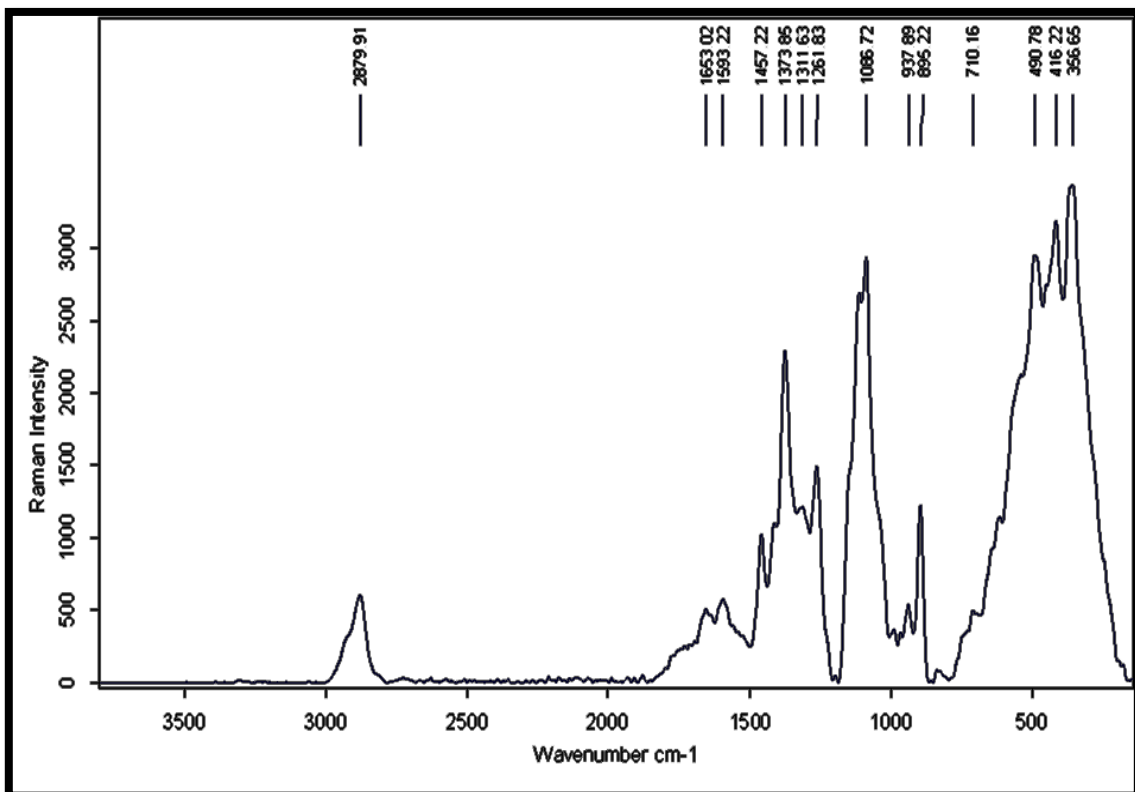

Figure 6. Raman spectra of Sulfonated Chitosan

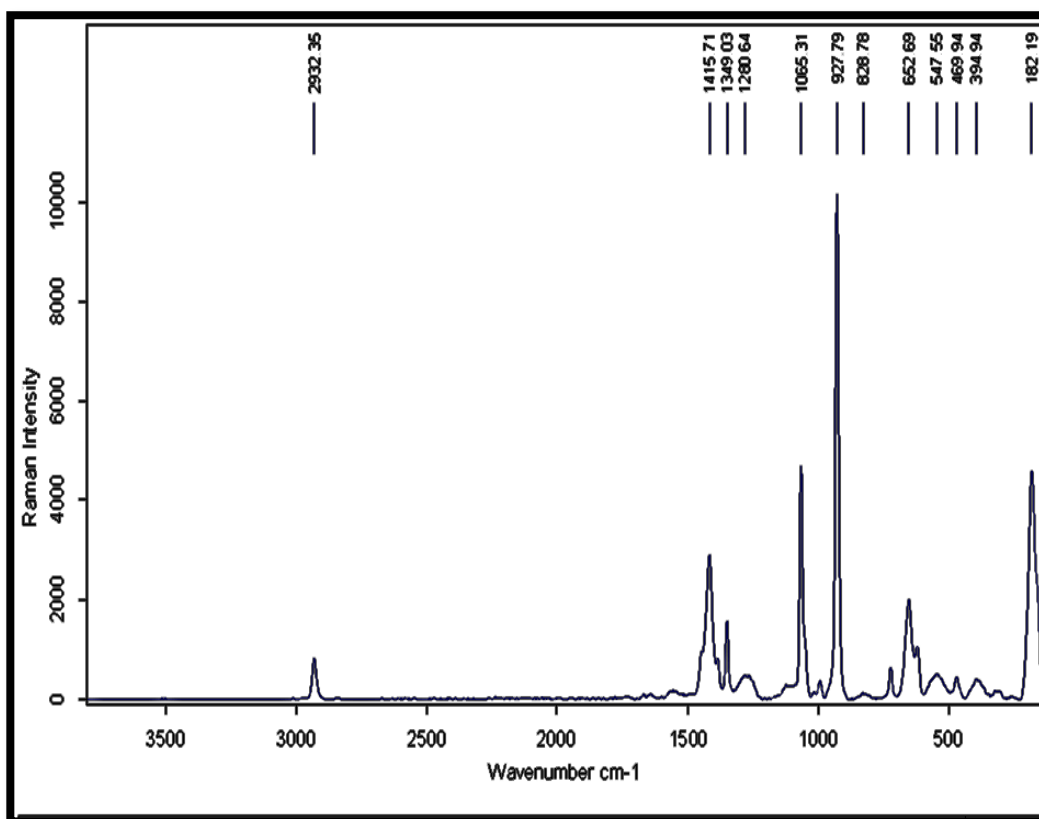

Figure 7. FT-IR spectra of Chitosan after four reaction run

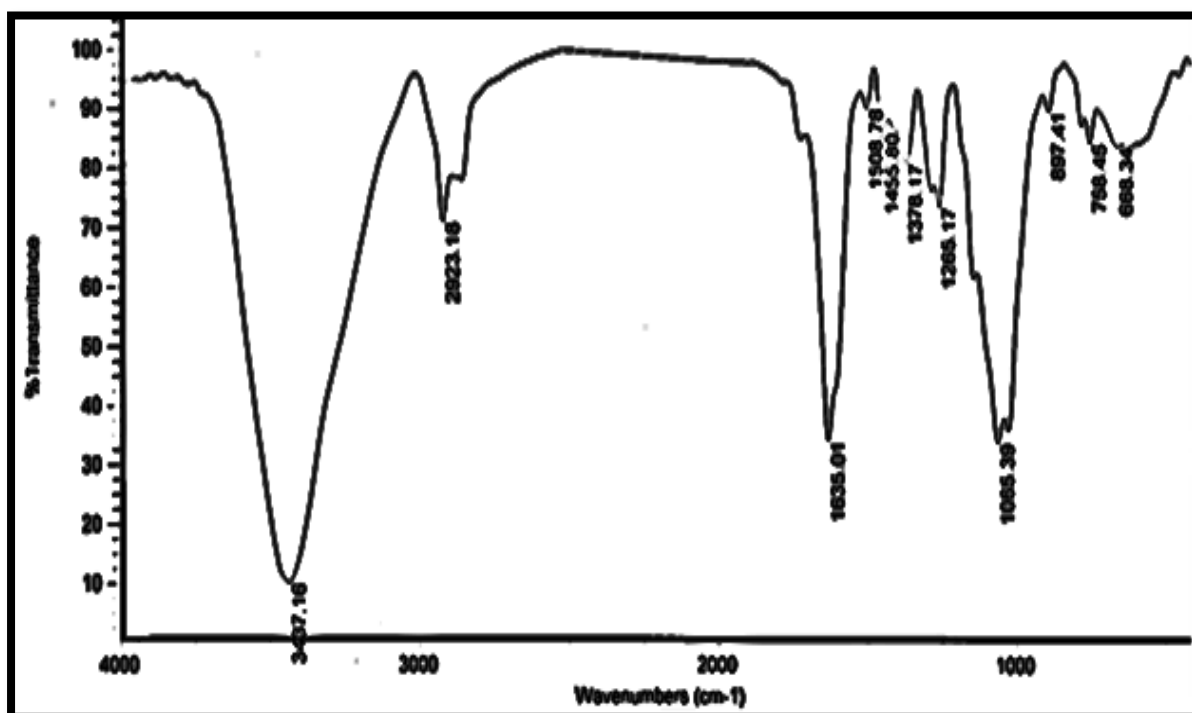

## 1,4-dihydropyridines spectroscopic Data:

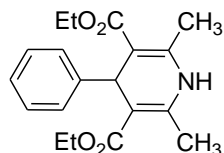

**M.P.** Found (°C): 157-158

**M.P.** Reported [Lit.] (°C) : 157-159 [101]

**R<sub>f</sub>** (Petrolom ether: Ethyl acetat, 3:2): 0.79

**M. F.:** C<sub>19</sub>NO<sub>4</sub>H<sub>23</sub>

**M.W.** extract (amu): 329

**IR (KBr)  $\nu$  (Cm<sup>-1</sup>):** 3341 (N-H), 1689 (2C=O), 1650 (C=C), 1488 (N-H), 1374, 1470 (C-H Bending CH<sub>3</sub>), 1211 (C-O), 701 (C-H Bending aromatic).

**<sup>1</sup>H NMR (CDCl<sub>3</sub>, 400 MHz)  $\delta$  (ppm):** 1.19 (t, J=7.2 Hz, 6H, 2CH<sub>3</sub>CH<sub>2</sub>), 2.33 (s, 6H, 2CH<sub>3</sub>), 4.08 (q, J=7.0 Hz, 4H, 2CH<sub>3</sub>CH<sub>2</sub>), 4.96 (s, 1H, CH), 5.97 (s, 1H, NH), 7.16–7.33 (m, 5H, Ar-H).

**<sup>13</sup>C NMR (CDCl<sub>3</sub>, 100 MHz)  $\delta$  (ppm):** 14.0, 19.4, 39.6, 59.5, 104.0, 121.8, 129.0, 131.0, 144.4, 146.5, 166.8 ppm.

**MS (ESI):** m/z 330 (M+H)<sup>+</sup>.

**Anal. Calcd. for C<sub>19</sub>H<sub>23</sub>NO<sub>4</sub> (%)**: C, 69.30; H, 6.99; N, 4.25. **Found:** C, 69.22; H, 6.94; N, 4.23

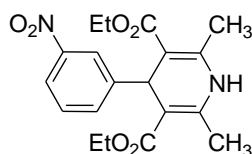

**M.P.** Found (°C): 162-164

**M.P.** Reported [Lit.] (°C): 162 – 164 [101]

**R<sub>f</sub>** (Petrolom ether: Ethyl acetat, 3:2): 0.89

**M. F.:** C<sub>19</sub>H<sub>22</sub>N<sub>2</sub>O<sub>6</sub>

**M.W.** extract (amu): 374

**IR (KBr)  $\nu$  (Cm<sup>-1</sup>):** 3344 (N-H), 1705 (2C=O), 1646 (C=C), 1486 (N-H), 1212 (C-O), 1346, 1446 (C-H Bending CH<sub>3</sub>), 704 (C-H Bending aromatic).

**<sup>1</sup>H NMR (CDCl<sub>3</sub>, 400 MHz)  $\delta$  (ppm):** 1.22 (t, J=7.2 Hz, 6H, 2CH<sub>3</sub>CH<sub>2</sub>), 2.36 (s, 6H, 2CH<sub>3</sub>), 4.08 (q, J=7.0 Hz, 4H, 2CH<sub>3</sub>CH<sub>2</sub>), 5.09 (s, 1H, CH), 5.82 (s, 1H, NH), 7.66–8.13 (m, 4H, Ar-H).

**<sup>13</sup>C NMR (CDCl<sub>3</sub>, 100 MHz)  $\delta$  (ppm):** 14.23, 19.47, 39.96, 59.98, 103.20, 121.3, 123.0, 128.0, 134.52, 144.95, 148.14, 149.99, 167.19 ppm.

**MS (ESI):** m/z 375 (M+ H)<sup>+</sup>

**Anal. Calcd. for C<sub>19</sub>H<sub>22</sub>N<sub>2</sub>O<sub>6</sub> (%)**: C, 60.96; H, 5.88; N, 7.49. **Found:** C, 60.88; H, 5.88; N, 7.47

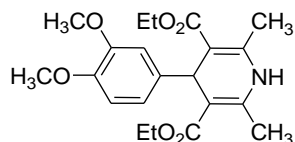

**M.P. Found (°C):** 147 - 148

**M.P. Reported [Lit.] (°C):** 146 -149 [101]

**R<sub>f</sub> (Petrolomy ether: Ethyl acetat, 3:2):** 0.89

**M. F.:** C<sub>23</sub>H<sub>27</sub>NO<sub>6</sub>

**M.W. extract (amu):** 389

**IR (KBr)  $\nu$ (Cm<sup>-1</sup>):** 3342 (N-H), 1688 (2C=O), 1649 (C=C), 1480 (N-H), 1209 (C-O), 691(C-H)

**<sup>1</sup>H NMR (CDCl<sub>3</sub>, 400 MHz)  $\delta$  (ppm):** 1.22 (t, J=7.2 Hz, 6H, 2CH<sub>3</sub>CH<sub>2</sub>), 2.34 (s, 6H, 2CH<sub>3</sub>), 3.68 (s, 6H, 2OCH<sub>3</sub>), 4.08 (q, J=7.2 Hz, 4H, 2CH<sub>2</sub>CH<sub>3</sub>), 4.95 (s, 1H, CH), 5.60 (s, 1H, NH), 6.7–6.8 (m, 3H, Ar-H).

**<sup>13</sup>C NMR (CDCl<sub>3</sub>, 100 MHz)  $\delta$  (ppm):** 14.30, 19.60, 38.74, 55.14, 59.71, 104.40, 113.18, 128.97, 140.34, 143.58, 157.87, 167.71

**MS (EI):** m/z 399 (M<sup>+</sup>).

**Anal. Calcd. For C<sub>23</sub>H<sub>29</sub>NO<sub>5</sub> (%):** C, 69.17; H, 7.27; N, 3.51. **Found:** C, 69.20; H, 7.30; N, 3.46

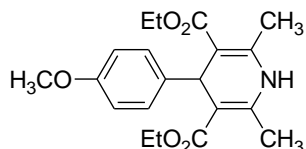

**M.P. Found (°C):** 157-159

**M.P. Reported [Lit.] (°C):** 156- 159 [101]

**R<sub>f</sub> (Petrolomy ether: Ethyl acetat, 3:2):** 0.85

**M. F. :** C<sub>20</sub>H<sub>25</sub> NO<sub>5</sub>

**M.W. extract (amu):** 359

**IR (KBr)  $\nu$  (Cm<sup>-1</sup>):** 3338 (N-H), 1690 (2C=O), 1680 (C=C), 1501 ( N-H), 1213 (C-O), 751(C-H Bending aromatic)

**<sup>1</sup>H NMR (CDCl<sub>3</sub>, 400 MHz)  $\delta$  (ppm):** 1.21 (t, J =7.4 Hz, 6H, 2CH<sub>3</sub>CH<sub>2</sub>), 2.29 (s, 6H, 2CH<sub>3</sub>), 4.10 (q, J =7.0 Hz, 4H, 2CH<sub>3</sub>CH<sub>2</sub>), 4.99 (s, 1H, CH), 6.07 (s, 1H, NH), 6.96–7.12(m, 4H, Ar-H), 3.62 (s, 3H, OCH<sub>3</sub>)

**<sup>13</sup>C NMR (CDCl<sub>3</sub>, 100 MHz)  $\delta$  (ppm):** 15.0, 20.0, 40.3, 59.5, 104.4, 118.8, 131.0, 131.5, 144.4, 147.3, 166.5

**MS (ESI):** m/z 360 (M +H)<sup>+</sup>

**Anal. Calcd. for C<sub>20</sub>H<sub>25</sub>NO<sub>5</sub> (%):** C, 66.85; 6.96; N, 3.90. **Found:** C, 66.77; H, 6.97; N, 3.88.

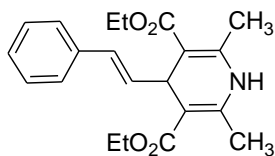

**M.P.** Found (°C): 145- 146

**M.P.** Reported [Lit.] (°C) : 147 – 149 [102]

**R** (Petrolom ether: Ethyl acetat, 3:2): 0.86

**M. F.:** C<sub>21</sub>H<sub>25</sub>NO<sub>4</sub>

**M.W.** extract (amu): 355

**IR (KBr)  $\nu$  (Cm<sup>-1</sup>):** 3337 (N-H), 1690, 1645 (2C=O), 1489 ( N-H), 1218 (C-O), 718(C-H Bending aromatic)

**<sup>1</sup>H NMR (CDCl<sub>3</sub>, 400 MHz)  $\delta$  (ppm):**  $\delta$  1.20 (t, 6H, J = 8.2 Hz), 2.45 (s, 6H), 4.15 (q, 4H, J = 8.2 Hz), 5.15 (d, 1H, J = 5.4 Hz), 5.75 (brs, 1H), 6.19 (t, 1H, J = 6.0 Hz), 7.20 (d, 1H, J = 16.6 Hz), 7.25 (m, 5H).

**<sup>13</sup>C NMR (CDCl<sub>3</sub>, 100 MHz)  $\delta$  (ppm):** 14.2, 19.3, 36.2, 51.1, 102.2, 126.3, 126.9, 128.0, 128.3, 131.8, 137.7, 145.4,168.1

**MS (EI):** m/z 365 (M<sup>+</sup>).

**Anal.Calcd. for C<sub>23</sub>H<sub>27</sub>NO<sub>3</sub> (%):** C, 75.62; H, 7.40; N, 3.83. **Found:** C, 75.60; H, 7.45; N, 3.85%.

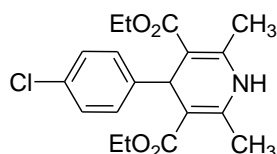

**M.P.** Found (°C): 144 – 146

**M.P.** Reported [Lit.] (°C): 146 – 148 [102]

**R<sub>f</sub>** (Petrolom ether: Ethyl acetat, 3:2): 0.9

**M. F.:** C<sub>19</sub>NO<sub>4</sub>H<sub>22</sub>Cl

**M.W.** extract (amu): 363

**IR (KBr)  $\nu$  (Cm<sup>-1</sup>):** 3335 (N-H), 1695, 1651 (2C=O), 1501 ( N-H), 1213 (C-O), 744(C-H Bending aromatic)

**<sup>1</sup>H NMR (CDCl<sub>3</sub>, 400 MHz)  $\delta$  (ppm):** 1.19 (t, J=7.2 Hz, 6H, 2CH<sub>3</sub>CH<sub>2</sub>), 2.34 (s, 6H, 2CH<sub>3</sub>), 4.10 (q, J= 7.2 Hz, 4H, 2CH<sub>3</sub>CH<sub>2</sub>), 5.09 (s, 1H, CH), 5.94 (s, 1H, NH), 7.22–7.48 (m, 4H, Ar-H)

**<sup>13</sup>C NMR (CDCl<sub>3</sub>, 100 MHz)  $\delta$  (ppm):** 14.6, 19.4, 39.8, 59.4, 103.6, 119.0, 130.4, 131.4, 144.5, 146.6, 166.8

**MS (ESI):** m/z 364.45 (M + H)<sup>+</sup>.

**for C<sub>19</sub>H<sub>22</sub>ClNO<sub>4</sub> (%):** C, 62.73; H, 6.05; N, 3.85. **Found:** C 62.64; H, 6.01; N, 3.80, **Anal. Calcd**

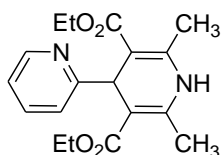

**M.P.** Found ( $^{\circ}\text{C}$ ) : 192 -194

**M.P.** Reported [Lit.] ( $^{\circ}\text{C}$ ): 148-150 [103]

**R<sub>f</sub>** (Petrolomy ether: Ethyl acetat, 3:2): 0.4

**M. F.:**  $\text{C}_{18}\text{H}_{22}\text{N}_2\text{O}_4$

**M.W.** extract (amu): 331

**IR (KBr)  $\nu$  ( $\text{Cm}^{-1}$ ):** 3324 (N-H), 1694 (C=O), 1654 (C=C), 1481(N-H), 1211 (C-O), 701 (C-H Bending aromatic)

**$^1\text{H}$  NMR ( $\text{CDCl}_3$ , 400 MHz)  $\delta$  (ppm):** 1.23 (t,  $J = 7.11$  Hz, 6H, 2  $\text{CH}_3\text{-CH}_2$ ), 2.28 (s, 6H, 2  $\text{CH}_3$ ), 4.06–4.12 (m, 4H,  $\text{OCH}_2\text{CH}_3$ ), 5.22 (s, 1H, CH), 7.16 (t,  $J = 4.88$ , 0.63 Hz, 1H), 7.43 (d,  $J = 7.77$ , 1H), 7.61 (t,  $J = 7.66$ , 1.69 Hz, 1H), 8.53 (d,  $J = 3.98$  Hz, 1H), 8.62 (brs, 1H, NH)

**$^{13}\text{C}$  NMR ( $\text{CDCl}_3$ , 100 MHz)  $\delta$  (ppm):** 14.71, 19.31, 43.24, 59.96, 102.15, 122.19, 124.71, 136.11, 146.73, 148.65, 165.63, 168.14

**MS (EI):** m/z: 330

**Anal. Calcd for  $\text{C}_{19}\text{H}_{23}\text{NO}_5$  (%):** C, 66.07; H, 6.71; and N, 4.06, **Found:** C, 66.04; H, 6.67; and N, 4.00

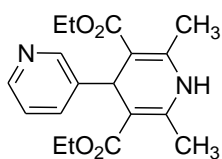

**M.P.** Found ( $^{\circ}\text{C}$ ): 190-192

**M.P.** Reported [Lit.] ( $^{\circ}\text{C}$ ): 190-192 [103]

**R<sub>f</sub>** (Petrolomy ether: Ethyl acetat, 3:2): 0.37

**M. F.:**  $\text{C}_{18}\text{H}_{22}\text{N}_2\text{O}_4$

**M.W.** extract (amu): 331

**IR (KBr)  $\nu$  ( $\text{Cm}^{-1}$ ):** 3324 (N-H), 1694 (C=O), 1654 (C=C), 1481(N-H), 1211 (C=O), 770 (C-H Bending aromatic)

**$^1\text{H}$  NMR ( $\text{CDCl}_3$ , 400 MHz)  $\delta$  (ppm) :** 1.24 (t,  $J = 7.13$  Hz, 6H, 2  $\text{CH}_3\text{-CH}_2$ ), 2.36 (s, 6H, 2 $\text{CH}_3$ ), 4.07–4.14 (m, 4H,  $\text{O-CH}_2\text{CH}_3$ ), 5.01 (s, 1H, CH), 6.61 (s, 1H, NH), 7.19 (dd,  $J = 7.83$ , 4.98 Hz, 1H), 7.64–7.66 (m, 1H), 8.39 (dd,  $J = 4.79$ , 1.57 Hz, 1H), 8.55 (d,  $J = 1.94$  Hz, 1H)

**$^{13}\text{C}$  NMR ( $\text{CDCl}_3$ , 100 MHz)  $\delta$  (ppm) :** 14.68, 19.75, 38.23, 60.27, 103.57, 123.55, 136.27, 144.00, 145.39, 147.40, 149.80, 167.64

**MS (EI):** m/z: 330 ( $\text{M}^+$ , 40)

**Anal. Calcd for  $\text{C}_{19}\text{H}_{23}\text{NO}_5$  (%):** C, 66.07; H, 6.71; and N, 4.06 **Found:** C, 66.04; H, 6.67; and N, 4.00

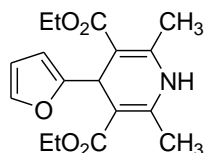

**M.P. Found (°C):** 149 -152

**M.P. Reported [Lit.] (°C):** 148 – 150 [103]

**R<sub>f</sub> (Petrolom ether: Ethyl acetat, 3:2):** 0.9

**M. F.:** C<sub>17</sub>NO<sub>5</sub>H<sub>21</sub>

**M.W. extract (amu):** 321

**IR (KBr)  $\nu$  (Cm<sup>-1</sup>):** 3345(N-H), 1700 (C=O), 1649(C=C), 1486(N-H), 1208 (C-O), 732 (C-H Bending aromatic)

**<sup>1</sup>H NMR (CDCl<sub>3</sub>, 400 MHz)  $\delta$  (ppm):** 1.30 (t, 6H, *J* = 8.2 Hz), 2.40 (s, 6H), 4.30 (q, 4H, *J* = 8.2 Hz), 5.30 (s, 1H), 5.80 (brs, 1H), 6.80–7.05 (m, 3H)

**<sup>13</sup>C NMR (CDCl<sub>3</sub>, 100 MHz)  $\delta$  (ppm):** 19.8, 41.0, 56.4, 105.7, 129.3, 130.7, 143.6, 149.0, 167.1 ppm

**MS (ESI):** m/z 320 (M+ H)<sup>+</sup>

**Anal. Calcd. for C<sub>17</sub>H<sub>21</sub>NO<sub>5</sub> (%):** C, 63.95; H, 6.58; N, 4.39. **Found:** C, 63.88; H, 6.55; N, 4.36

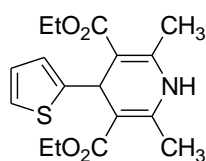

**M.P. Found (°C):** 169 - 171

**M.P. Reported [Lit.] (°C):** 172 – 174 [103]

**R<sub>f</sub> (Petrolom ether: Ethyl acetat, 3:2):** 0.62

**M. F.:** C<sub>17</sub>H<sub>21</sub>NO<sub>4</sub>S

**M.W. extract (amu):** 335

**IR (KBr)  $\nu$  (Cm<sup>-1</sup>):** 3344 (N-H), 1692(C=O), 1645(N-H), 1486 (N-H), 1212 (C-O), 721 (C-H Bending aromatic)

**<sup>1</sup>H NMR (CDCl<sub>3</sub>, 400 MHz)  $\delta$  (ppm):** 1.19 (t, *J* = 7.4 Hz, 6H, 2CH<sub>3</sub>CH<sub>2</sub>), 2.28 (s, 6H, 2CH<sub>3</sub>), 4.08 (q, *J* = 7.2 Hz, 4H, 2CH<sub>3</sub>CH<sub>2</sub>), 5.04 (s, 1H, CH), 6.07 (s, 1H, NH), 6.08–6.13 (m, 2H, Thienyl-H), 6.89 (m, 1H, Thienyl-H) ppm.

**<sup>13</sup>C NMR (CDCl<sub>3</sub>, 100 MHz)  $\delta$  (ppm):** 14.3, 19.4, 37.3, 59.8, 103.6, 118.8, 132.0, 133.8, 144.5, 147.9, 167.5 ppm

**MS (ESI):** m/z 336 (M +H)<sup>+</sup>.

**Anal. Calcd. for C<sub>17</sub>H<sub>21</sub>NO<sub>4</sub>S (%):** C, 60.89; H, 6.27; N, 4.18. **Found:** C, 60.80; H, 6.28; N, 4.17
